# Supplementary material for: Fibroblast to myofibroblast transition is enhanced by increased cell density
Source: PubMed Central journal article supplement — Mol Biol Cell. 2021 Dec 1;32(22):ar41. doi: 10.1091/mbc.E20-08-0536 (PMC8694087; doi:10.1091/mbc.e20-08-0536), 2021-12-01
Supplement: mbc-32-ar41-s001.pdf [file mbc-32-ar41-s001.pdf]

# Supplemental Materials

Molecular Biology of the Cell

Doolin *et al.*

*Supplemental Information for:*

*Title:* Fibroblast to Myofibroblast Transition is Enhanced by Increased Cell Density

*Authors.* Mary T. Doolin<sup>1</sup>, Ian M. Smith<sup>1</sup> & Kimberly M. Stroka<sup>1,2,3,4</sup>

*Affiliations.* 1 Fischell Department of Bioengineering, University of Maryland, College Park, College Park, MD, United States, 2 Maryland Biophysics Program, University of Maryland, College Park, College Park, MD, United States, 3 Center for Stem Cell Biology & Regenerative Medicine, University of Maryland, Baltimore, Baltimore, MD, United States, 4 Marlene and Stewart Greenebaum Comprehensive Cancer Center, University of Maryland, Baltimore, Baltimore, MD, United States

## Supplemental Figures:

**Supplemental Figure S1.** Fraction of mitotic HLFs for conditions of varying cell density and TGF- $\beta$ 1 treatment. Images from experiments represented in Figure 5 of the main text were analyzed by counting the number of cells whose nuclei visually appeared mitotic and dividing by the total number of nuclei, to obtain the fraction of mitotic cells shown in this plot. Each dot represents the mitotic fraction of cells for each image, pooled from 3 independent experiments (\* indicates  $p < 0.05$ ).

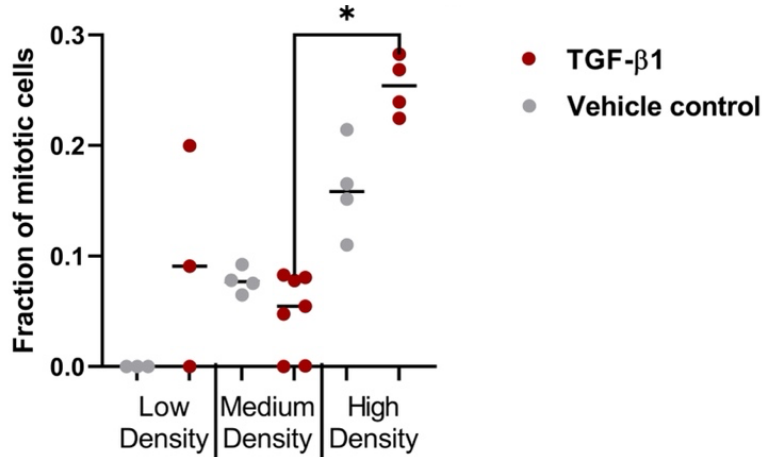

**Supplemental Figure S2.** Mean gray value of nuclear Hoechst staining for HLFs under conditions of varying cell density and TGF- $\beta$ 1 treatment. Images from experiments represented in Figure 5 of the main text were analyzed by quantifying the Hoechst fluorescence intensity (in arbitrary units) in individual cell nuclei. Box and whisker plots are shown and represent nuclei pooled from 3 independent experiments (\* indicates  $p < 0.05$ ).

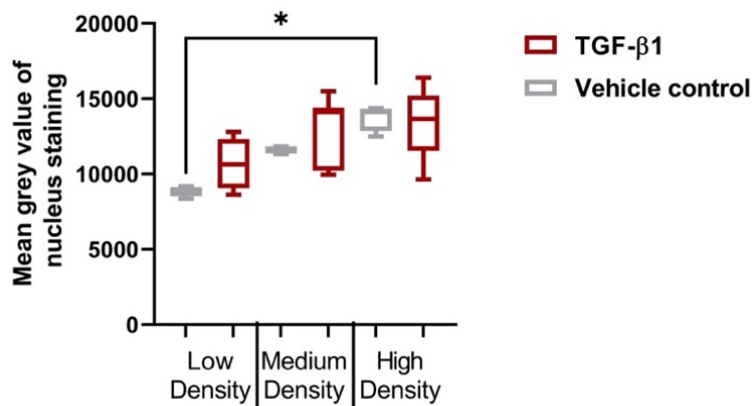

Supplemental Tables containing statistical comparisons:

**Supplemental Table 1. Statistical comparisons for mean nucleus area, accompanying Figure 5D.**

Note: \* $P < 0.05$ , \*\* $P < 0.01$ , \*\*\* $P < 0.001$  via a Kruskal-Wallis test with Dunn's multiple comparisons test.

| Comparisons    | Control vs. TGF- $\beta$ 1 | Comparisons     | Control | TGF- $\beta$ 1 |
|----------------|----------------------------|-----------------|---------|----------------|
| Low density    | ns                         | Low vs. medium  | **      | *              |
| Medium density | ns                         | Low vs. high    | ****    | ns             |
| High density   | ****                       | Medium vs. high | ****    | ***            |

**Supplemental Table 2. Statistical comparisons for mean number of nuclei per image, accompanying Figure 9C**

Note: \* $P < 0.05$ , \*\* $P < 0.01$ , \*\*\* $P < 0.001$  via a Kruskal-Wallis test with Dunn's multiple comparisons test.

| Comparisons | Control vs TGF- $\beta$ 1 | Comparisons              | Control | TGF- $\beta$ 1 |
|-------------|---------------------------|--------------------------|---------|----------------|
| TCPS        | ns                        | TCPS vs. PDMS            | ns      | ns             |
| PDMS        | ns                        | TCPS vs. 5 $\mu$ m       | **      | **             |
| 5 $\mu$ m   | ns                        | TCPS vs. 10 $\mu$ m      | ns      | ns             |
| 10 $\mu$ m  | ns                        | TCPS vs. 20 $\mu$ m      | ns      | *              |
| 20 $\mu$ m  | ns                        | TCPS vs. 50 $\mu$ m      | ns      | **             |
| 50 $\mu$ m  | ns                        | PDMS vs. 5 $\mu$ m       | ns      | ns             |
|             |                           | PDMS vs. 10 $\mu$ m      | ns      | ns             |
|             |                           | PDMS vs. 20 $\mu$ m      | ns      | ns             |
|             |                           | PDMS vs. 50 $\mu$ m      | ns      | ns             |
|             |                           | 5 $\mu$ m vs. 10 $\mu$ m | ns      | ns             |
|             |                           | 5 $\mu$ m vs. 20 $\mu$ m | ns      | ns             |
|             |                           | 5 $\mu$ m vs. 50 $\mu$ m | ns      | ns             |
|             |                           | 10 $\mu$ m vs 20 $\mu$ m | ns      | ns             |
|             |                           | 10 $\mu$ m vs 50 $\mu$ m | ns      | ns             |
|             |                           | 20 $\mu$ m vs 50 $\mu$ m | ns      | ns             |

**Supplemental Table 3. Statistical comparisons for mean nucleus area, accompanying Figure 9D**

Note: \* $P < 0.05$ , \*\* $P < 0.01$ , \*\*\* $P < 0.001$  via a Kruskal-Wallis test with Dunn's multiple comparisons test.

| Comparisons | Control vs TGF- $\beta$ 1 |
|-------------|---------------------------|
| TCPS        | ****                      |
| PDMS        | ****                      |
| 5 $\mu$ m   | ns                        |
| 10 $\mu$ m  | ns                        |
| 20 $\mu$ m  | *                         |
| 50 $\mu$ m  | ns                        |

| Comparisons              | Control | TGF- $\beta$ 1 |
|--------------------------|---------|----------------|
| TCPS vs. PDMS            | ns      | ns             |
| TCPS vs. 5 $\mu$ m       | ns      | ****           |
| TCPS vs. 10 $\mu$ m      | ****    | ****           |
| TCPS vs. 20 $\mu$ m      | ns      | ****           |
| TCPS vs. 50 $\mu$ m      | ns      | ****           |
| PDMS vs. 5 $\mu$ m       | ns      | **             |
| PDMS vs. 10 $\mu$ m      | ns      | ****           |
| PDMS vs. 20 $\mu$ m      | *       | ****           |
| PDMS vs. 50 $\mu$ m      | *       | ****           |
| 5 $\mu$ m vs. 10 $\mu$ m | ***     | ***            |
| 5 $\mu$ m vs. 20 $\mu$ m | ns      | ns             |
| 5 $\mu$ m vs. 50 $\mu$ m | ns      | ****           |
| 10 $\mu$ m vs 20 $\mu$ m | ****    | ns             |
| 10 $\mu$ m vs 50 $\mu$ m | ns      | ns             |
| 20 $\mu$ m vs 50 $\mu$ m | ****    | ns             |
